# Supplementary material for: A dendritic oligoarylamine-substituted benzimidazole derivative as a useful n-type dopant
Source: Royal Society of Chemistry journal article supplement (doi:10.1039/c8tc01280f), 2018-01-01
Supplement: c8tc01280f1.pdf [file c8tc01280f1.pdf]

### Supporting Information for

## A dendritic oligoarylamine-substituted benzimidazole derivative as a useful n-type dopant

Masashi Uebe,<sup>a</sup> Yuji Yoshihashi,<sup>b</sup> Kei Noda,<sup>\*b</sup> Masayuki Matsubara,<sup>a</sup> and Akihiro Ito<sup>\*a</sup>

---

<sup>a</sup> *Department of Molecular Engineering, Graduate School of Engineering, Kyoto University, Nishikyo-ku, Kyoto 615-8510, Japan*  
*E-mail: aito@scl.kyoto-u.ac.jp*

<sup>b</sup> *Department of Electronics and Electrical Engineering, Keio University, 3-14-1 Hiyoshi, Kohoku-ku, Yokohama, Kanagawa 223-8522, Japan*  
*E-mail: nodakei@elec.keio.ac.jp*

## Contents:

|         |                                                                                                   |
|---------|---------------------------------------------------------------------------------------------------|
| p.S3–S8 | <sup>1</sup> H- and <sup>13</sup> C-NMR Spectra for Compounds <b>2</b> and <b>N3-DMBI-H</b>       |
| p.S9    | Fig. S1 (The frontier Kohn-Sham orbital energy diagram for <b>N-DMBI-H</b> and <b>N3-DMBI-H</b> ) |
| p.S11   | Fig. S2 (Two-terminal I-V characteristics for undoped and doped PCBM thin films)                  |
| p.S11   | Fig. S3 (UV/Vis-NIR spectra for undoped and doped PCBM thin films)                                |

# <sup>1</sup>H- and <sup>13</sup>C-NMR Spectra of 2 and N3-DMBI-H.

<sup>1</sup>H-NMR spectrum of 2 (CDCl<sub>3</sub>).

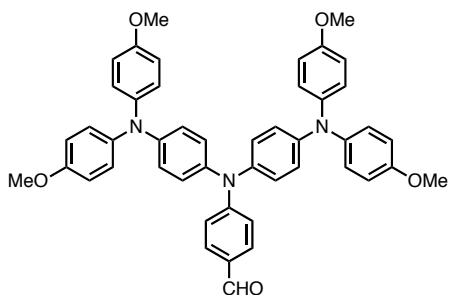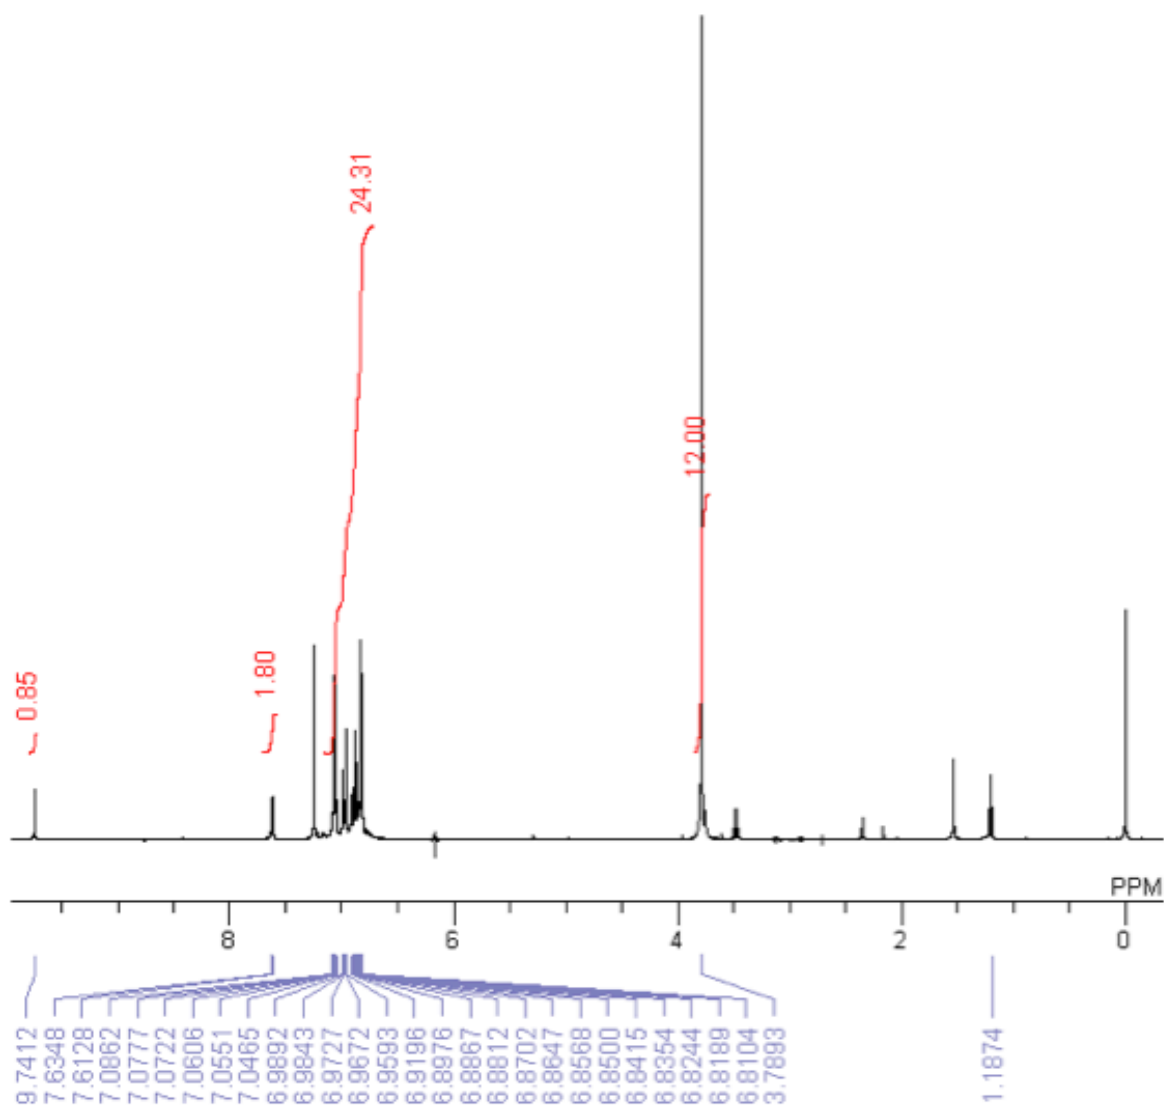

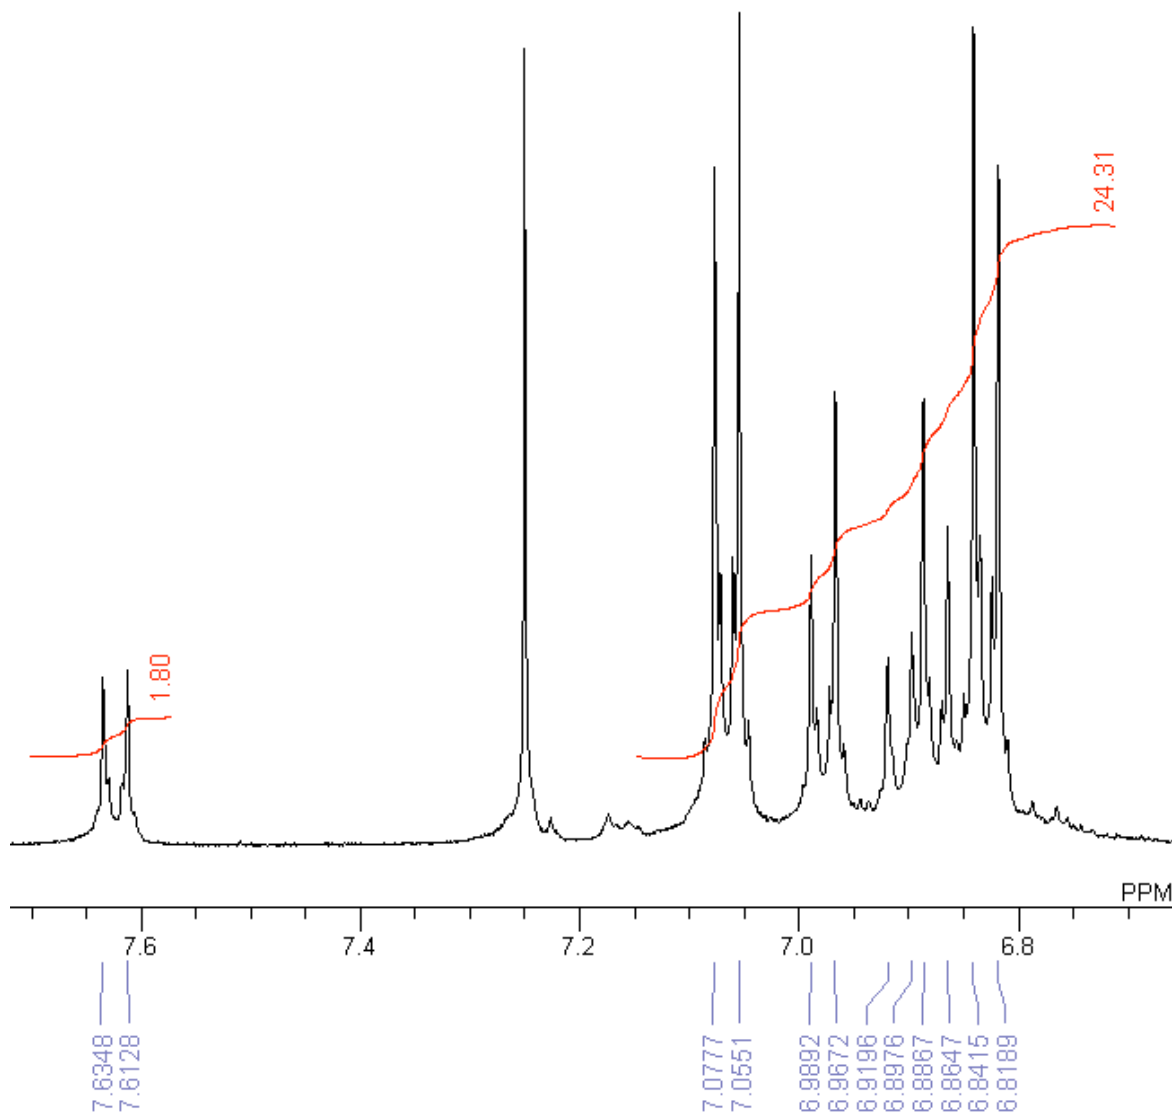

$^{13}\text{C}$ -NMR spectrum of **2** ( $\text{CDCl}_3$ ).

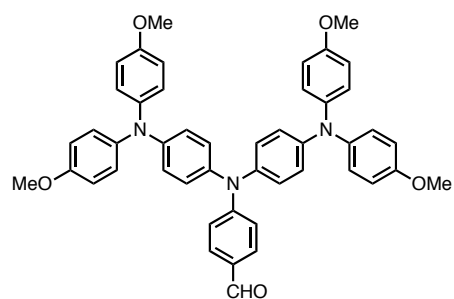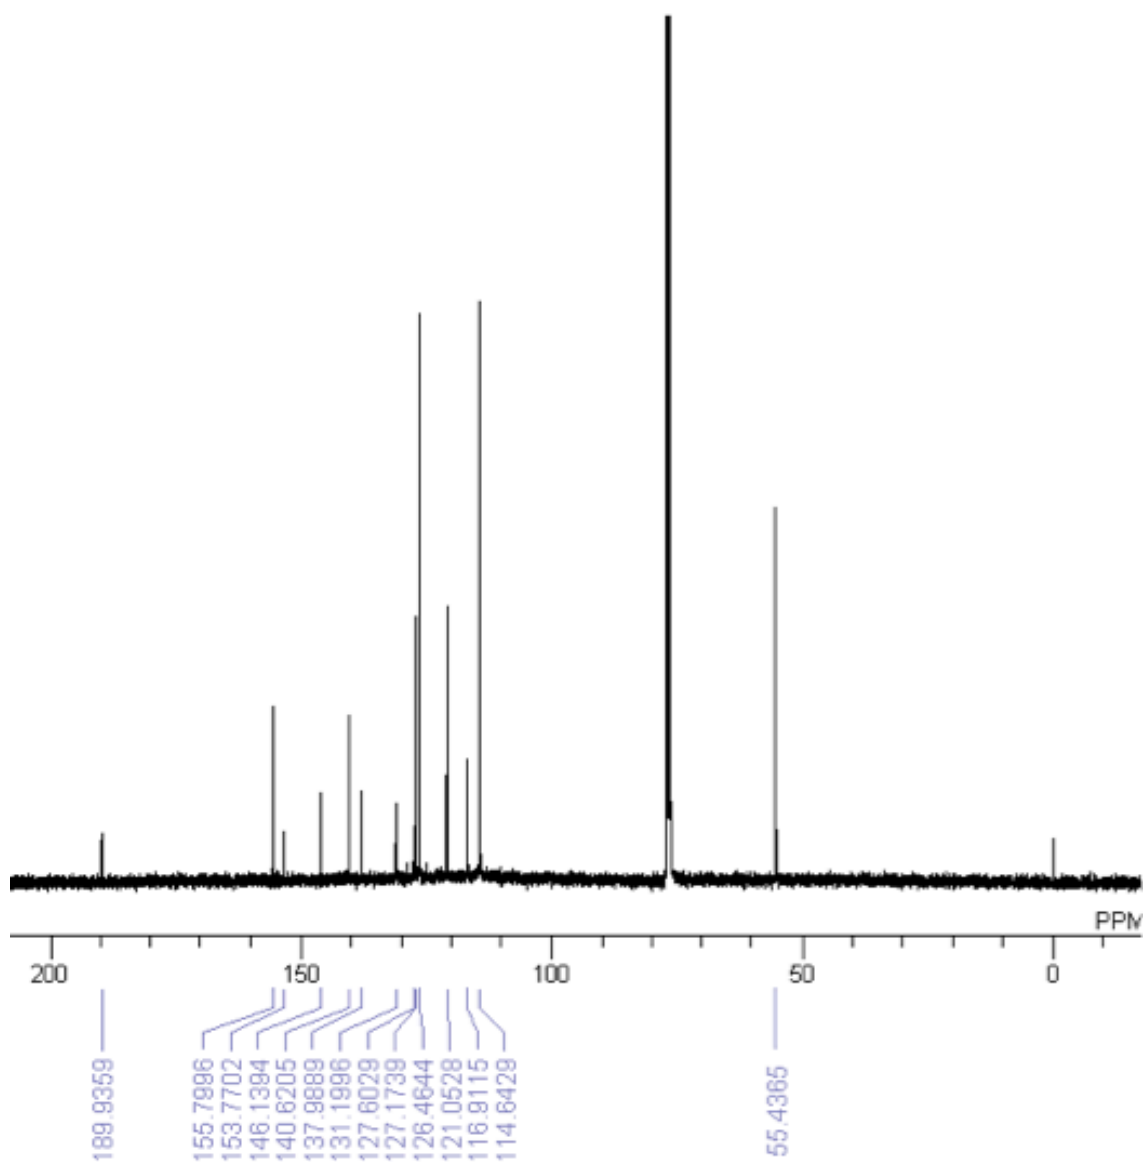



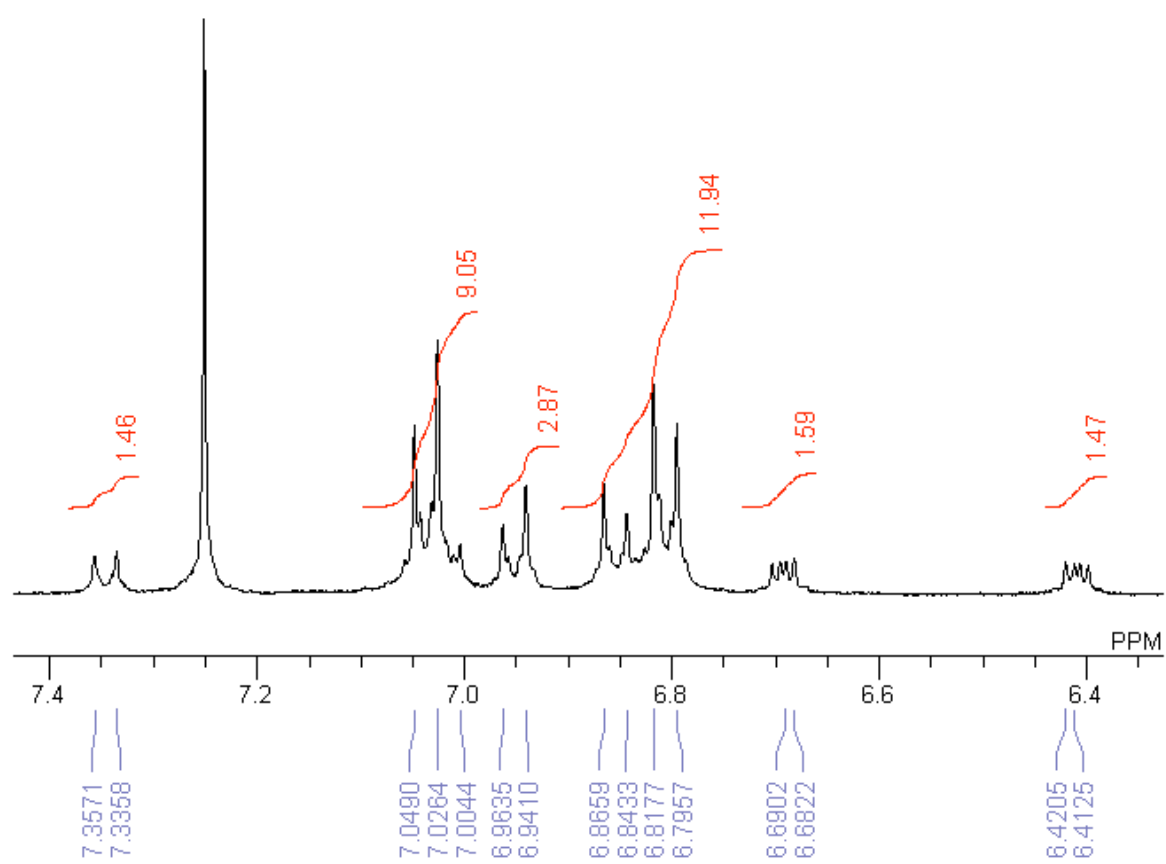





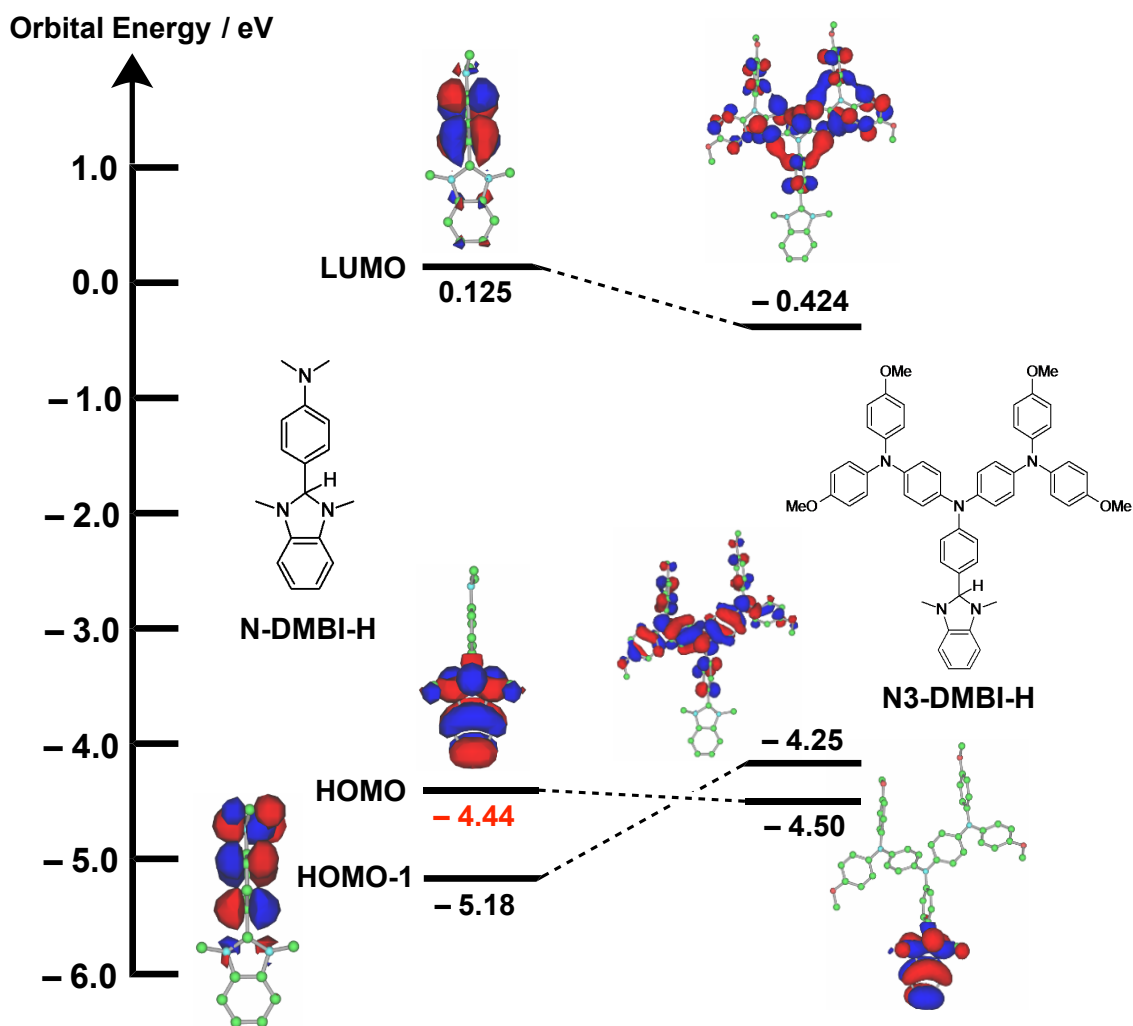

**Fig. S1.** Frontier Kohn-Sham orbital energy levels for N-DMBI-H and N3-DMBI-H at the B3LYP/6-31G\* level of theory. Note that the raising of the HOMO-1 level occurs owing to the introduction of dendritic triamino groups, and the energy levels of the benzimidazole-localized HOMO and the amino-localized HOMO-1 for N-DMBI-H are inverted for N3-DMBI-H.

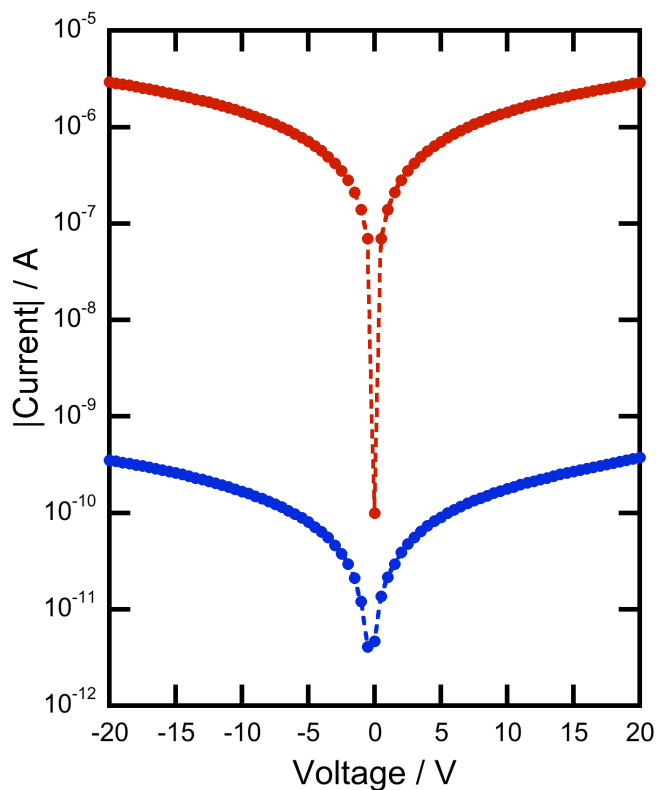

**Fig. S2.** Two-terminal  $I$ - $V$  characteristics of undoped (blue) and 10 wt% N-DMBI-H-doped (red) PCBM thin films (channel length: 50 nm).

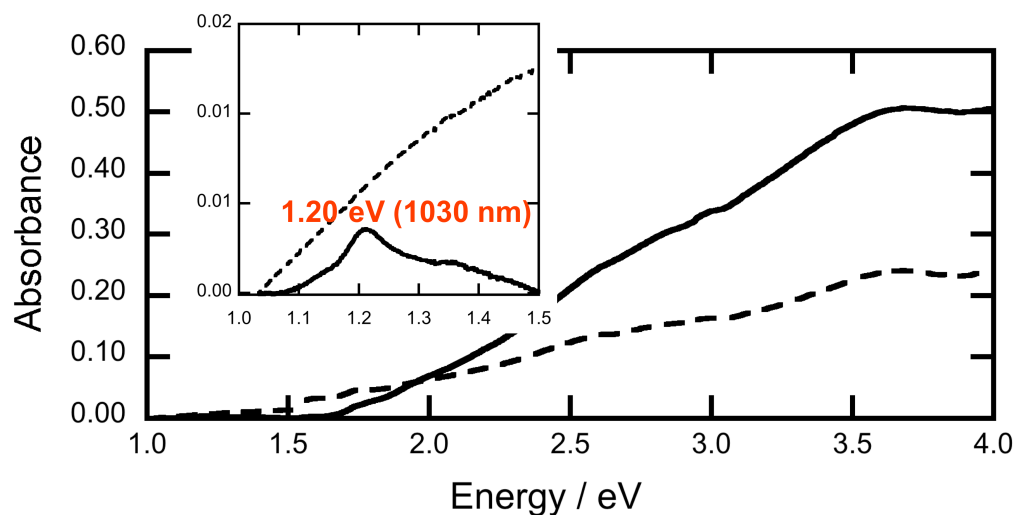

**Fig. S3.** UV/Vis-NIR spectra for undoped (broken line) and 5 wt% N3-DMBI-H-doped (solid line) PCBM thin films; the inset shows the partial enlargement of the spectra in the lower energy region.
